# Supplementary material
Source: PubMed Central journal article supplement (PMC5359001)
Supplement: NIHMS848998-supplement-Suppl_Information.pdf [file NIHMS848998-supplement-Suppl_Information.pdf]

# Supplemental Information

**SUPPLEMENTAL TABLE 3** State- and Territory-Specific Changes in the Prevalence of High Weight-for-Length Among Infants in the WIC-PC Survey From 2000 Through 2004 and From 2010 Through 2014

| State                | 2000 to 2004          |             |                                         | 2010 to 2014 |             |                                         |
|----------------------|-----------------------|-------------|-----------------------------------------|--------------|-------------|-----------------------------------------|
|                      | <i>n</i> <sup>a</sup> | High WFL, % | Prevalence Change (95% CI) <sup>b</sup> | <i>n</i>     | High WFL, % | Prevalence Change (95% CI) <sup>b</sup> |
| Alabama              | 31267                 | 12.5        | 0.7 (0.2 to 1.3)                        | 43957        | 12.9        | 0.2 (-0.2 to 0.7)                       |
| Alaska               | 5982                  | 16.0        | 1.9 (0.5 to 3.4)                        | 6100         | 16.5        | 0.9 (-0.6 to 2.6)                       |
| Arizona              | 41103                 | 12.7        | 1.3 (0.8 to 1.8)                        | 41678        | 15.3        | -2.8 (-3.2 to -2.3)                     |
| Arkansas             | 13575                 | 10.1        | 0.9 (0.2 to 1.7)                        | 20972        | 13.1        | -2.0 (-2.6 to -1.4)                     |
| California           | 362429                | 14.8        | 1.0 (0.8 to 1.2)                        | 403041       | 17.3        | -3.6 (-3.7 to -3.4)                     |
| Colorado             | 15053                 | 6.7         | 0.4 (-0.2 to 1.0)                       | 25245        | 8.1         | -1.1 (-1.5 to -0.7)                     |
| Connecticut          | 15966                 | 11.1        | -0.7 (-1.4 to -0.0)                     | 13164        | 12.3        | -1.7 (-2.5 to -0.9)                     |
| Delaware             | 3587                  | 14.6        | -3.0 (-4.2 to -1.6)                     | 5201         | 14.0        | 0.1 (-1.2 to 1.4)                       |
| District of Columbia | 3598                  | 10.2        | 1.2 (-0.2 to 2.8)                       | 3579         | 12.8        | -1.7 (-3.1 to -0.1)                     |
| Florida              | 64654                 | 13.5        | 0.2 (-0.1 to 0.6)                       | 115168       | 14.2        | -2.1 (-2.4 to -1.9)                     |
| Georgia              | 52114                 | 11.3        | 1.0 (0.6 to 1.4)                        | 106764       | 11.5        | -1.7 (-2.0 to -1.5)                     |
| Hawaii               | 11237                 | 12.1        | NA <sup>c</sup>                         | 13437        | 11.2        | -1.3 (-2.0 to -0.6)                     |
| Idaho                | 11020                 | 8.2         | 0.2 (-0.5 to 1.0)                       | 11818        | 10.2        | -1.0 (-1.7 to -0.2)                     |
| Illinois             | 81315                 | 13.5        | 3.8 (3.5 to 4.2)                        | 100445       | 12.5        | -0.7 (-0.9 to -0.3)                     |
| Indiana              | 28678                 | 11.0        | 1.6 (1.1 to 2.2)                        | 37011        | 13.6        | -1.9 (-2.4 to -1.4)                     |
| Iowa                 | 17017                 | 13.0        | 0.8 (0.0 to 1.6)                        | 25237        | 13.4        | 0.4 (-0.2 to 1.0)                       |
| Kansas               | 12936                 | 12.0        | 4.6 (3.7 to 5.6)                        | 25911        | 12.6        | -1.8 (-2.4 to -1.3)                     |
| Kentucky             | 23691                 | 17.8        | 1.2 (0.5 to 1.9)                        | 27129        | 19.6        | -7.4 (-7.9 to -6.9)                     |
| Louisiana            | 21918                 | 13.3        | 2.7 (2.0 to 3.4)                        | 33380        | 16.8        | -1.6 (-2.1 to -1.0)                     |
| Maine                | 4557                  | 14.2        | 0.2 (-1.1 to 1.7)                       | 9976         | 12.7        | -2.3 (-3.1 to -1.4)                     |
| Maryland             | 18556                 | 14.5        | -0.5 (-1.2 to 0.1)                      | 31121        | 14.7        | -0.5 (-1.0 to 0.1)                      |
| Massachusetts        | 25423                 | 15.4        | 0.8 (0.1 to 1.4)                        | 28286        | 16.7        | -2.4 (-3.0 to -1.9)                     |
| Michigan             | 74870                 | 10.6        | 1.3 (1.0 to 1.7)                        | 51570        | 12.9        | -1.0 (-1.4 to -0.7)                     |
| Minnesota            | 17774                 | 13.3        | 0.3 (-0.3 to 1.0)                       | 30457        | 12.3        | -1.2 (-1.7 to -0.7)                     |
| Mississippi          | 17566                 | 16.2        | 0.8 (0.0 to 1.6)                        | 24126        | 17.7        | -2.4 (-3.0 to -1.7)                     |
| Missouri             | 41369                 | 11.6        | 2.0 (1.5 to 2.6)                        | 46897        | 12.4        | -2.5 (-2.9 to -2.1)                     |
| Montana              | 4375                  | 12.1        | 0.8 (-0.5 to 2.3)                       | 7748         | 10.2        | -0.9 (-1.8 to 0.0)                      |
| Nebraska             | 10437                 | 14.4        | -0.0 (-0.9 to 0.9)                      | 13439        | 14.1        | 0.6 (-0.3 to 1.5)                       |
| Nevada               | 15567                 | 11.0        | 1.7 (1.0 to 2.5)                        | 23255        | 12.4        | 0.1 (-0.5 to 0.7)                       |
| New Hampshire        | 4664                  | 13.1        | 1.0 (-0.4 to 2.5)                       | 6411         | 13.0        | -1.5 (-2.6 to -0.4)                     |
| New Jersey           | 39922                 | 15.1        | 1.7 (1.2 to 2.3)                        | 53110        | 15.1        | -1.1 (-1.5 to -0.7)                     |
| New Mexico           | 17331                 | 9.3         | 0.6 (-0.0 to 1.3)                       | 13097        | 13.1        | -2.6 (-3.3 to -1.8)                     |
| New York             | 113640                | 12.9        | 0.2 (-0.1 to 0.5)                       | 107374       | 14.1        | -2.2 (-2.4 to -1.9)                     |
| North Carolina       | 38011                 | 11.7        | 0.8 (0.4 to 1.3)                        | 58763        | 11.8        | 0.4 (0.1 to 0.8)                        |
| North Dakota         | 4025                  | 12.1        | 0.0 (-1.3 to 1.5)                       | 5065         | 12.3        | -1.0 (-2.2 to 0.3)                      |
| Ohio                 | 82471                 | 11.4        | 0.4 (0.1 to 0.7)                        | 104540       | 12.2        | 0.2 (-0.1 to 0.5)                       |
| Oklahoma             | 19765                 | 12.9        | 0.1 (-0.6 to 0.8)                       | 21964        | 12.8        | -2.3 (-2.9 to -1.8)                     |
| Oregon               | 26180                 | 13.5        | -2.4 (-2.9 to -1.9)                     | 36551        | 10.6        | 0.2 (-0.2 to 0.7)                       |
| Pennsylvania         | 51506                 | 13.4        | -0.4 (-0.8 to -0.0)                     | 57842        | 13.6        | -1.6 (-1.9 to -1.2)                     |
| Rhode Island         | 5992                  | 14.2        | 0.6 (-0.6 to 1.9)                       | 5764         | 15.9        | -1.8 (-3.0 to -0.4)                     |
| South Carolina       | 22248                 | 12.2        | 3.5 (2.8 to 4.3)                        | 27838        | 13.7        | -1.5 (-2.1 to -1.0)                     |
| South Dakota         | 5666                  | 11.3        | 3.5 (2.1 to 5.0)                        | 4973         | 16.2        | -0.5 (-1.9 to 1.1)                      |
| Tennessee            | 32139                 | 13.4        | -0.1 (-0.6 to 0.4)                      | 36840        | 15.0        | -2.0 (-2.5 to -1.6)                     |
| Texas                | 139778                | 16.4        | 0.9 (0.6 to 1.1)                        | 221750       | 16.2        | -1.3 (-1.5 to -1.1)                     |
| Utah                 | 18279                 | 9.7         | 1.4 (0.8 to 2.1)                        | 24944        | 11.3        | -4.4 (-4.8 to -3.9)                     |

TABLE 3 Continued

| State                    | 2000 to 2004          |                 |                                         | 2010 to 2014 |             |                                         |
|--------------------------|-----------------------|-----------------|-----------------------------------------|--------------|-------------|-----------------------------------------|
|                          | <i>r</i> <sup>a</sup> | High WFL, %     | Prevalence Change (95% CI) <sup>b</sup> | <i>n</i>     | High WFL, % | Prevalence Change (95% CI) <sup>b</sup> |
| Vermont                  | 4848                  | 9.2             | 0.8 (-0.3 to 2.1)                       | 5183         | 9.0         | 0.6 (-0.6 to 1.9)                       |
| Virginia                 | 35 149                | 13.6            | 8.2 (7.5 to 9.0)                        | 33 245       | 24.0        | -1.1 (-1.7 to -0.5)                     |
| Washington               | 53 153                | 10.6            | 1.5 (1.1 to 1.9)                        | 64 628       | 12.8        | -1.6 (-2.0 to -1.3)                     |
| West Virginia            | 10 027                | 10.6            | 0.4 (-0.4 to 1.2)                       | 15 477       | 9.4         | 1.9 (1.1 to 2.8)                        |
| Wisconsin                | 21 815                | 12.8            | 1.9 (1.2 to 2.6)                        | 28 409       | 15.5        | -1.9 (-2.5 to -1.3)                     |
| Wyoming                  | 3 492                 | 7.3             | -1.2 (-2.2 to 0.0)                      | 2 997        | 9.8         | -3.3 (-4.3 to -2.0)                     |
| Territory                |                       |                 |                                         |              |             |                                         |
| American Samoa           | 1 191                 | 16.5            | 3.0 (0.1 to 6.6)                        | 1 322        | 16.1        | 6.1 (2.9 to 9.8)                        |
| Guam                     | 1 411                 | 13.7            | -0.1 (-2.2 to 2.6)                      | 2 021        | 9.7         | -1.7 (-3.2 to 0.1)                      |
| Northern Mariana Islands | NA <sup>c</sup>       | NA <sup>c</sup> | NA <sup>c</sup>                         | 1 022        | 13.1        | -1.4 (-4.0 to 2.0)                      |
| Puerto Rico              | 45 134                | 18.8            | -2.9 (-3.3 to -2.4)                     | 51 259       | 19.1        | -9.0 (-9.3 to -8.7)                     |
| Virgin Islands           | 1 853                 | 11.7            | -2.4 (-4.2 to -0.1)                     | 1 231        | 11.1        | 0.7 (-1.8 to 3.8)                       |

<sup>a</sup> For each time period, the columns represent the *n* and prevalence of high weight-for-length (WFL) at the beginning of the period. The prevalence ratio change is the prevalence at the end of the period minus the prevalence at the beginning. This change was calculated from the relative risk based on a Poisson regression model that included age and race as covariates.

<sup>b</sup> The prevalence at the beginning of the period and the prevalence ratio were used to estimate the adjusted percentage change.

<sup>c</sup> NA indicates that data were not available (missing). The 2002 and 2004 data for Hawaii were excluded because the prevalence estimates were inconsistent with other annual estimates from the state.
